# Supplementary material
Source: publisher figshare collection journal article supplement (https://acs.figshare.com/ndownloader/files/4570480)
Supplement: Supplementary file 1 [file 4570480]

**Supplementary Information for:**

**Functional Hyperbranched Polymers using Ring  
Opening Metathesis Polymerization of  
Dicyclopentadiene with Monoterpenes**

*Robert T. Mathers,<sup>\*†</sup> Krishnan Damodaran,<sup>§</sup> Matthew G. Rendos,<sup>†</sup> Michael S. Lavrich<sup>†</sup>*

Department of Chemistry, Pennsylvania State University, New Kensington, PA 15068.

Department of Chemistry, University of Pittsburgh, Pittsburgh, PA 15260.

## Table of Contents

|            |                                                                                                                                     |
|------------|-------------------------------------------------------------------------------------------------------------------------------------|
| Figure S1  | Mark-Houwink-Sakarada plots for the polymerizations of norbornene and dicyclopentadiene with <i>d</i> -limonene                     |
| Figure S2  | Mark-Houwink-Sakarada plots for the polymerizations of dicyclopentadiene with $\beta$ -pinene                                       |
| Figure S3  | Gel permeation chromatography (GPC) data for the polymerization of norbornene in toluene, <i>d</i> -limonene, and $\beta$ -pinene   |
| Figure S4  | Gel permeation chromatography (GPC) data for the polymerization of dicyclopentadiene with stoichiometric amounts of $\beta$ -pinene |
| Figure S5  | Gel permeation chromatography (GPC) data for the polymerization of dicyclopentadiene with stoichiometric amounts of limonene oxide  |
| Figure S6  | $^1\text{H}$ NMR spectra for polymerization of norbornene with limonene oxide                                                       |
| Figure S7  | $^1\text{H}$ NMR spectra for polymerization of dicyclopentadiene with neat $\beta$ -pinene                                          |
| Figure S8  | $^1\text{H}$ NMR spectra for polymerization of norbornene with neat $\beta$ -pinene                                                 |
| Figure S9  | $^{13}\text{C}$ NMR spectrum for polymerization of norbornene with limonene oxide                                                   |
| Figure S10 | $^{13}\text{C}$ NMR spectrum for polymerization of dicyclopentadiene with limonene oxide                                            |
| Figure S11 | $^{13}\text{C}$ NMR spectrum for limonene oxide                                                                                     |
| Figure S12 | $^{13}\text{C}$ NMR spectrum for polymerization of dicyclopentadiene with $\beta$ -pinene                                           |

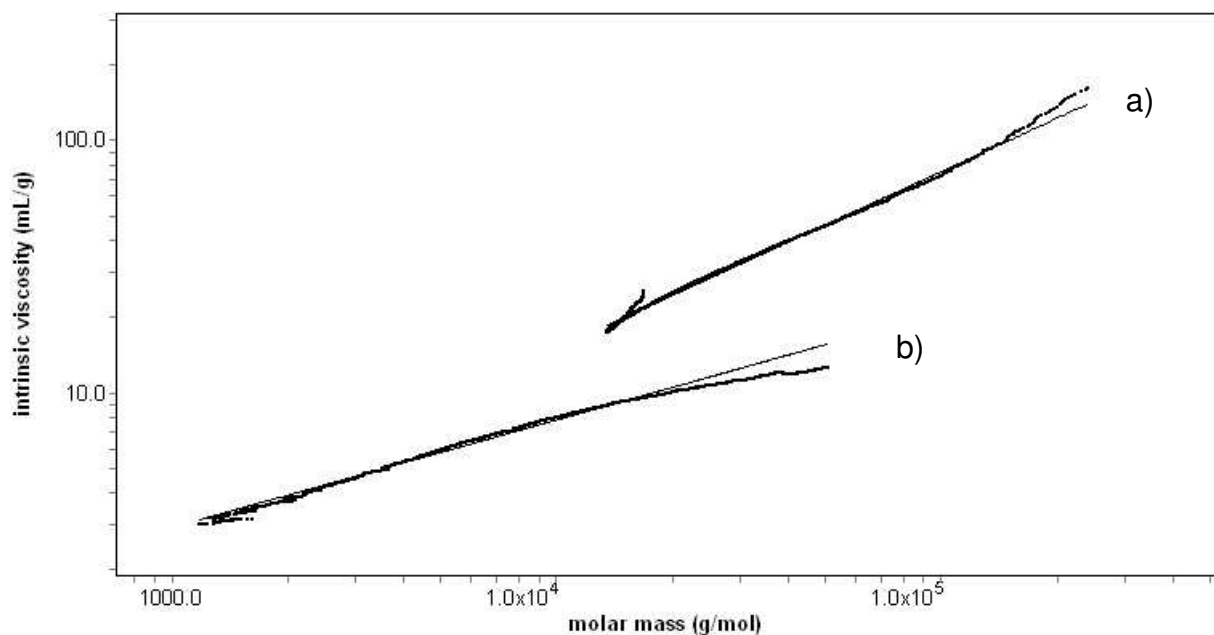

Figure S1. Mark-Houwink-Sakarada plots for the gel permeation chromatography (GPC) data (light scattering and viscometer detectors) obtained for the ring-opening metathesis polymerization (ROMP) of a) norbornene (1.3 M in *d*-limonene; MHS a value = 0.70) and b) dicyclopentadiene (0.3 M in *d*-limonene; MHS a value = 0.53). The polymerizations were run with a second generation ruthenium catalyst ([monomer]/[catalyst] = 800) for 1 h.

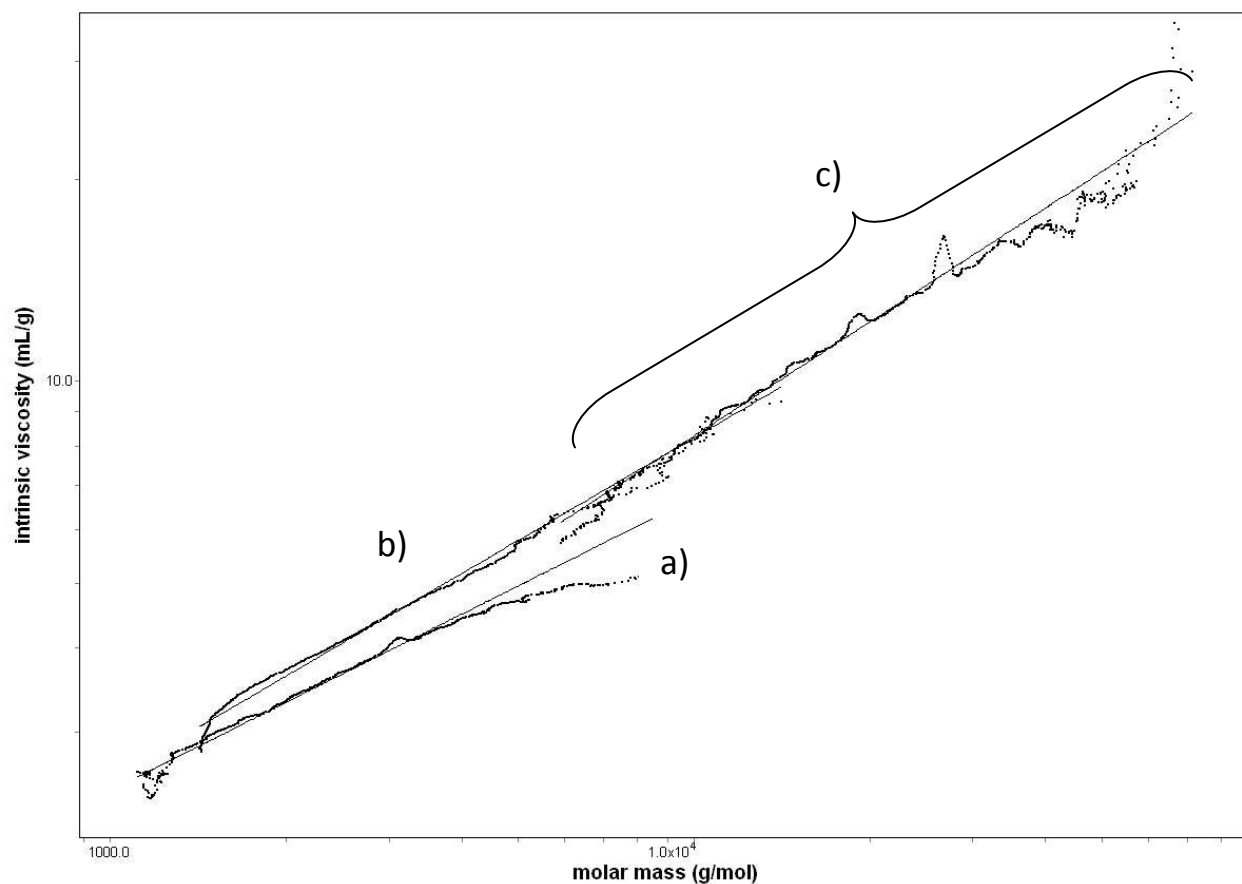

Figure S2. Mark-Houwink-Sakarada plots for the gel permeation chromatography (GPC) data (light scattering and viscometer detectors) obtained for the ring-opening metathesis polymerizations (ROMP) of dicyclopentadiene (0.3 M). The polymerizations were run with a second generation ruthenium catalyst for 1 h at 50° C using a) neat  $\beta$ -pinene and  $[\text{monomer}]/[\text{catalyst}] = 200$ , b) neat  $\beta$ -pinene and  $[\text{monomer}]/[\text{catalyst}] = 1000$ , and c) stoichiometric amounts of  $\beta$ -pinene ( $[\text{monomer}]/[\beta\text{-pinene}] = 5$ ) in toluene and  $[\text{monomer}]/[\text{catalyst}] = 1000$ .

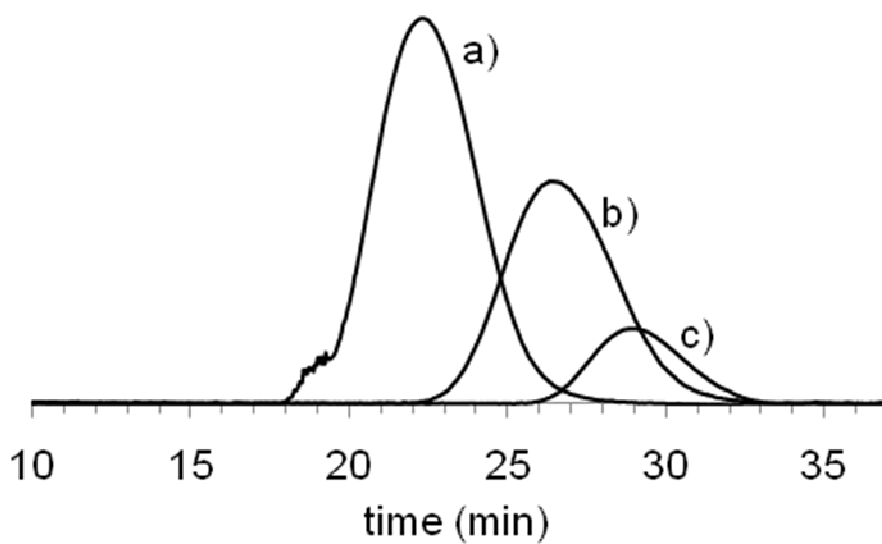

Figure S3. Gel permeation chromatography (GPC) data (light scattering detector) for the polymerization of norbornene with the 2<sup>nd</sup> generation Grubbs catalyst ([NB]/[catalyst] = 1000) in a) toluene, b) *d*-limonene and c)  $\beta$ -pinene. The polymerizations were run for 1 h at 50° C under nitrogen.

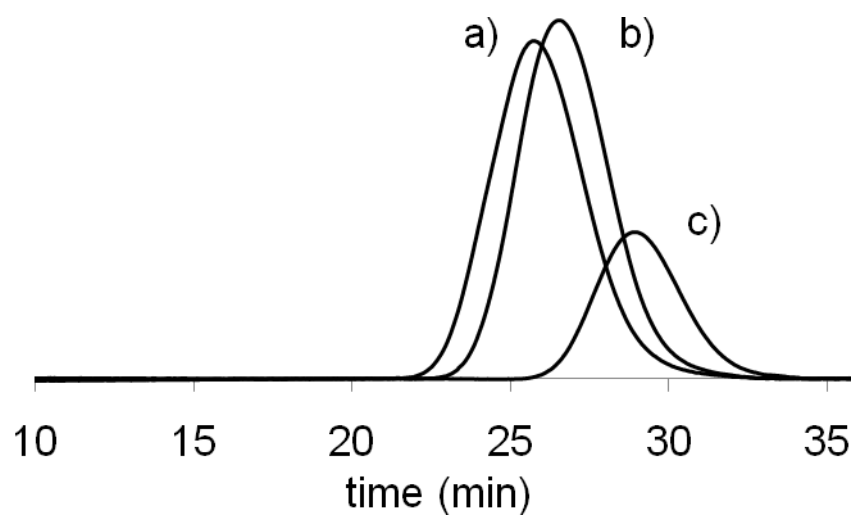

Figure S4. Gel permeation chromatography (GPC) data (light scattering detector) for the polymerization of dicyclopentadiene (DCPD) in toluene with stoichiometric amounts of  $\beta$ -pinene: a)  $[\text{DCPD}]/[\beta\text{-pinene}] = 40$ , b)  $[\text{DCPD}]/[\beta\text{-pinene}] = 20$  and c)  $[\text{DCPD}]/[\beta\text{-pinene}] = 5$ . The polymerizations were run for 1 h at 50° C under nitrogen with the 2<sup>nd</sup> generation Grubbs catalyst ( $[\text{DCPD}]/[\text{catalyst}] = 1000$ ).

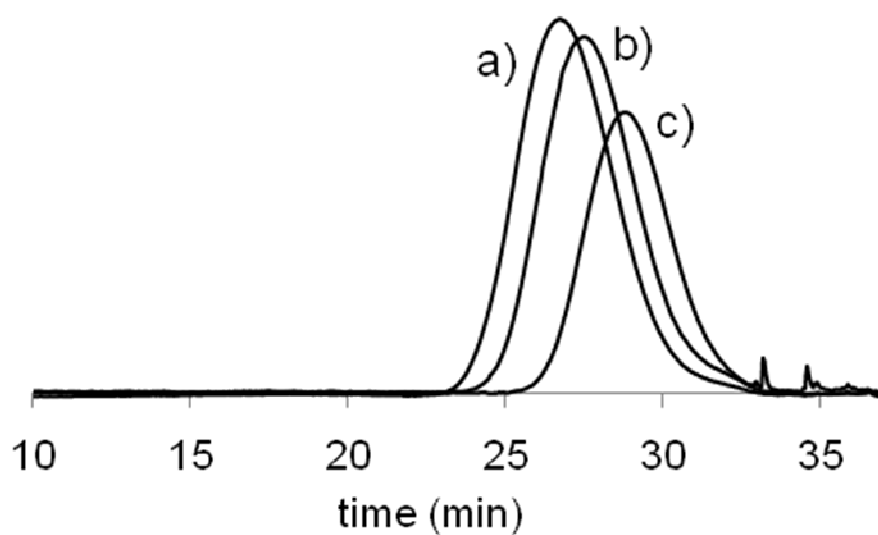

Figure S5. Gel permeation chromatography (GPC) data (light scattering detector) for the polymerization of dicyclopentadiene (DCPD) in toluene with stoichiometric amounts of limonene oxide: a)  $[\text{DCPD}]/[\text{limonene oxide}] = 40$ , b)  $[\text{DCPD}]/[\text{limonene oxide}] = 20$  and c)  $[\text{DCPD}]/[\text{limonene oxide}] = 5$ . The polymerizations were run for 1 h at 50° C under nitrogen with the 2<sup>nd</sup> generation Grubbs catalyst ( $[\text{DCPD}]/[\text{catalyst}] = 1000$ ).

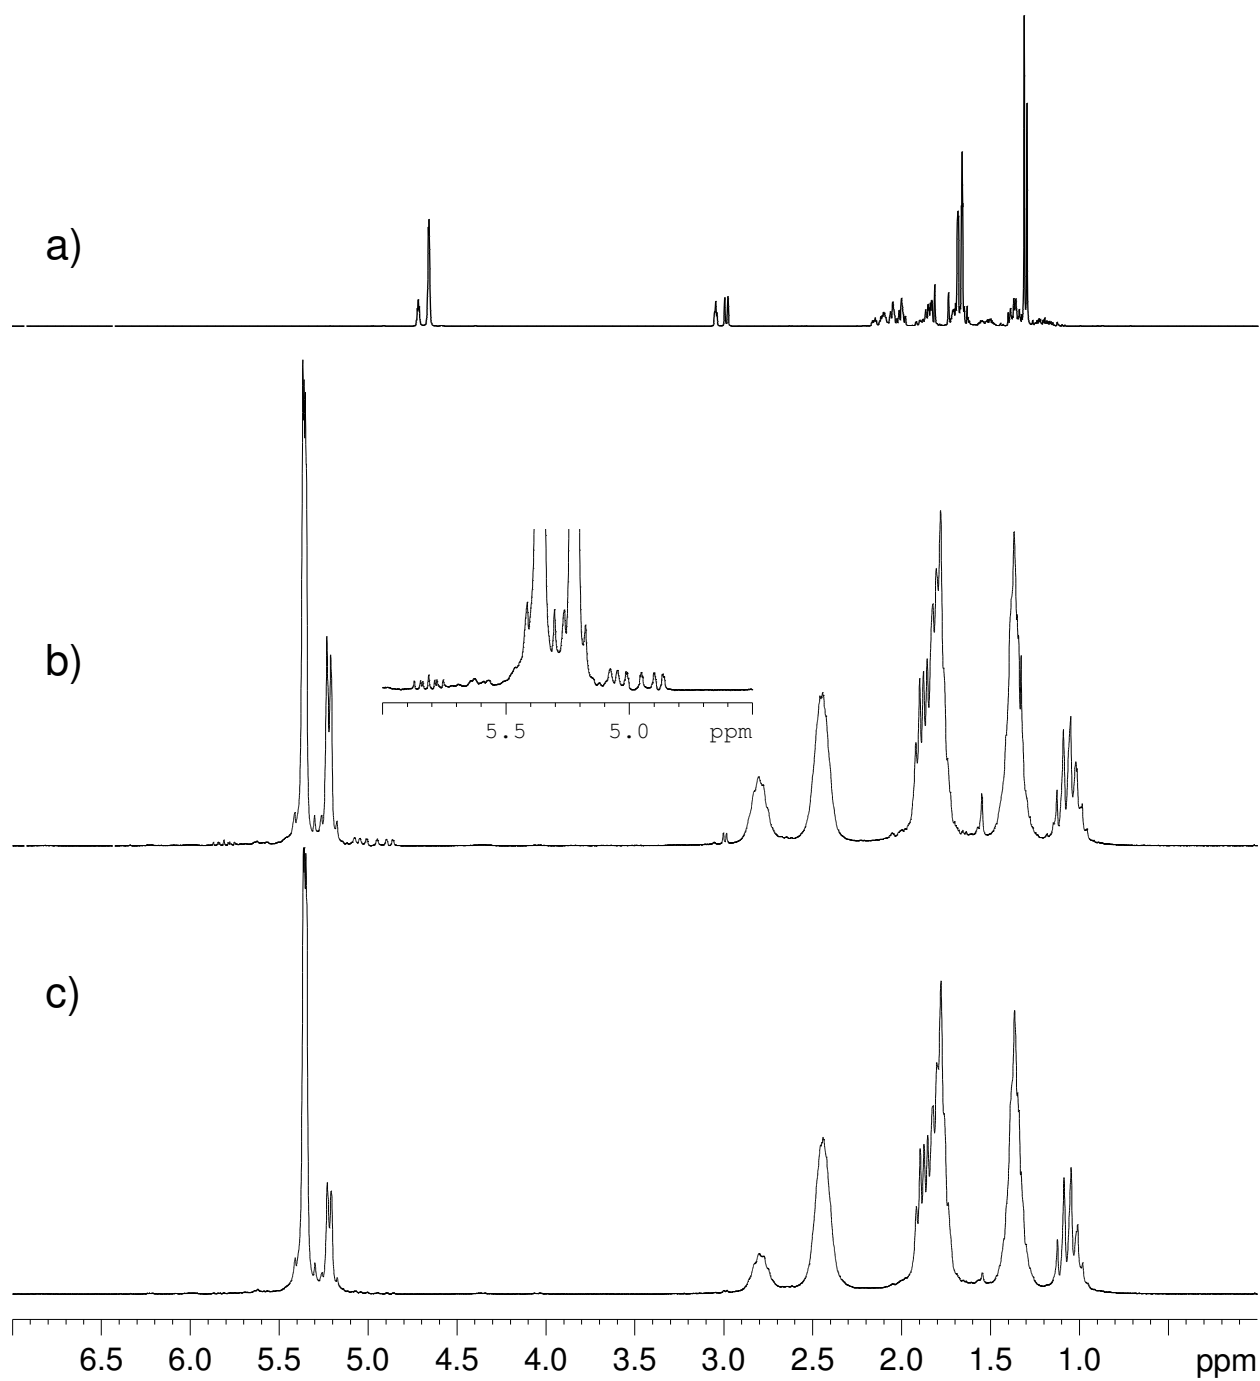

Figure S6.  $^1\text{H}$  NMR (300 MHz,  $\text{CDCl}_3$ ) spectra for a) limonene oxide, b) polymerization of norbornene at  $50^\circ\text{C}$  for 1 h with  $[\text{NB}]/[\text{limonene oxide}] = 3$  ( $M_w = 7800\text{ g/mol}$ ;  $M_w/M_n = 1.3$ ) and c) polymerization of norbornene at  $50^\circ\text{C}$  for 1 h with  $[\text{NB}]/[\text{limonene oxide}] = 40$  ( $M_w = 24300\text{ g/mol}$ ;  $M_w/M_n = 1.3$ ).



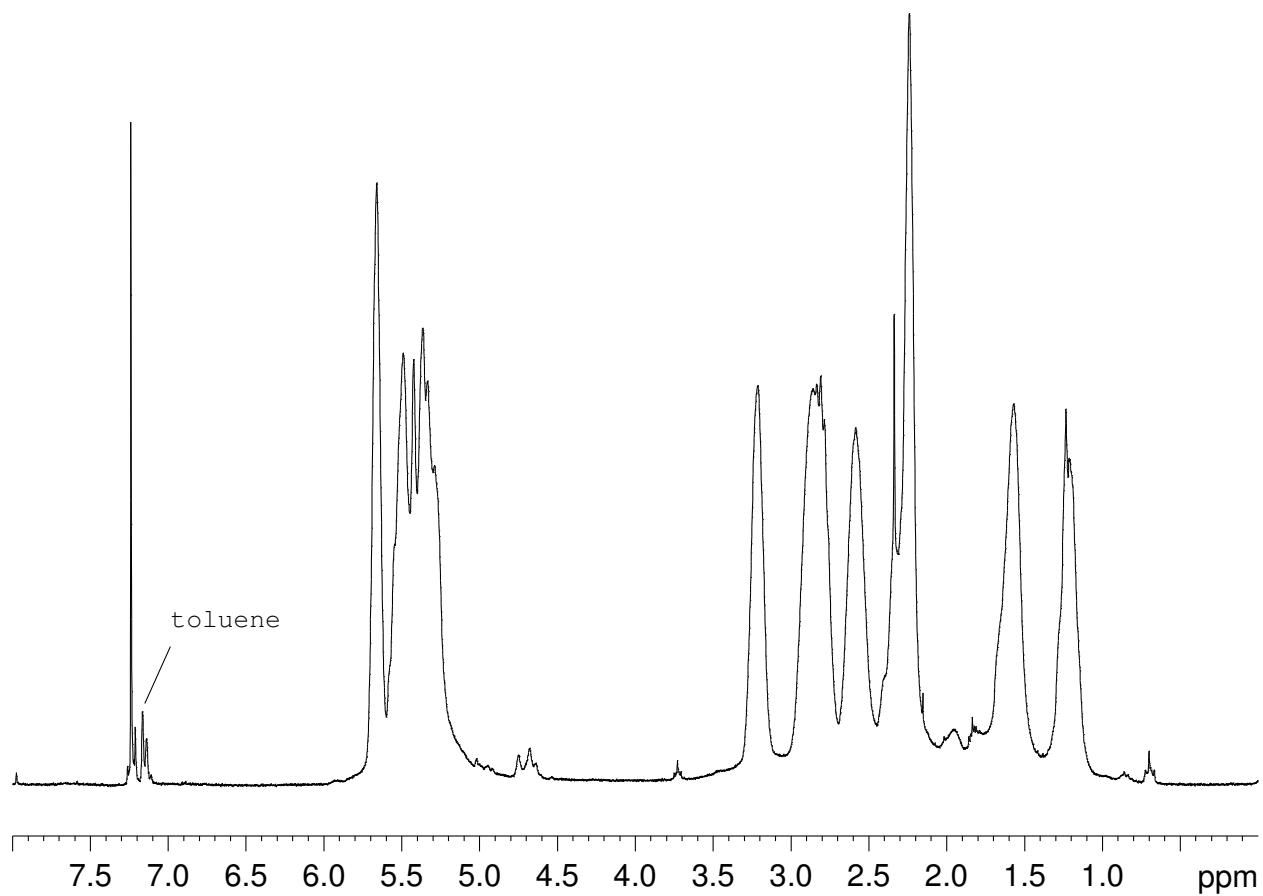

Figure S7.  $^1\text{H}$  NMR (300 MHz,  $\text{CDCl}_3$ ) spectrum for polymerization of dicyclopentadiene (0.3 M) in toluene with  $\beta$ -pinene ( $[\text{DCPD}]/[\beta\text{-pinene}] = 40$ ) for 1 h at  $50^\circ\text{C}$  using  $[\text{DCPD}]/[\text{catalyst}] = 1000$ .

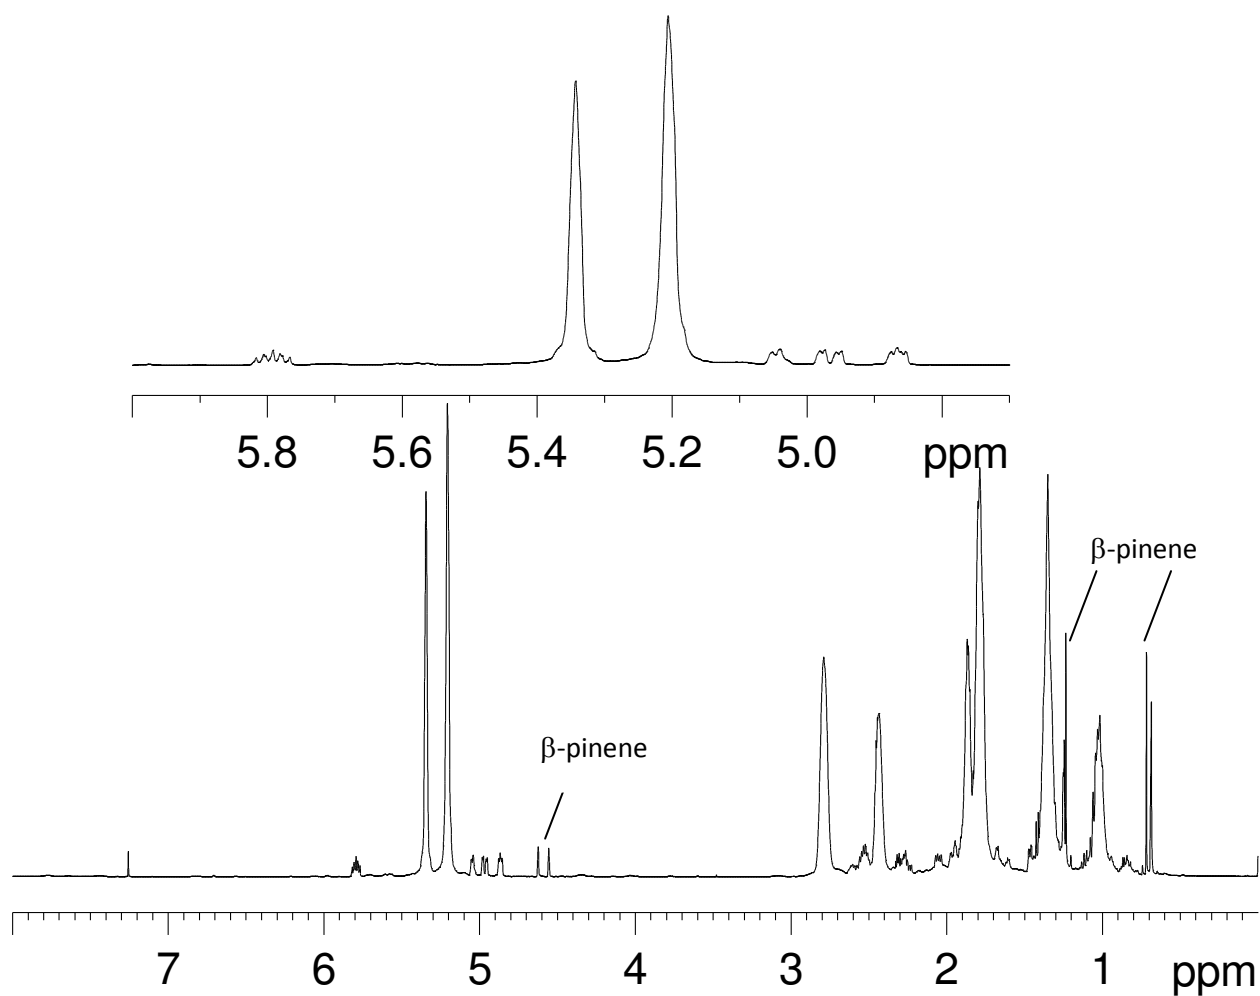

Figure S8.  $^1\text{H}$  NMR (700 MHz,  $\text{CDCl}_3$ ) spectrum and expanded view of alkene region for polymerization of norbornene (0.3 M) at 50° C for 1 h with neat  $\beta$ -pinene.

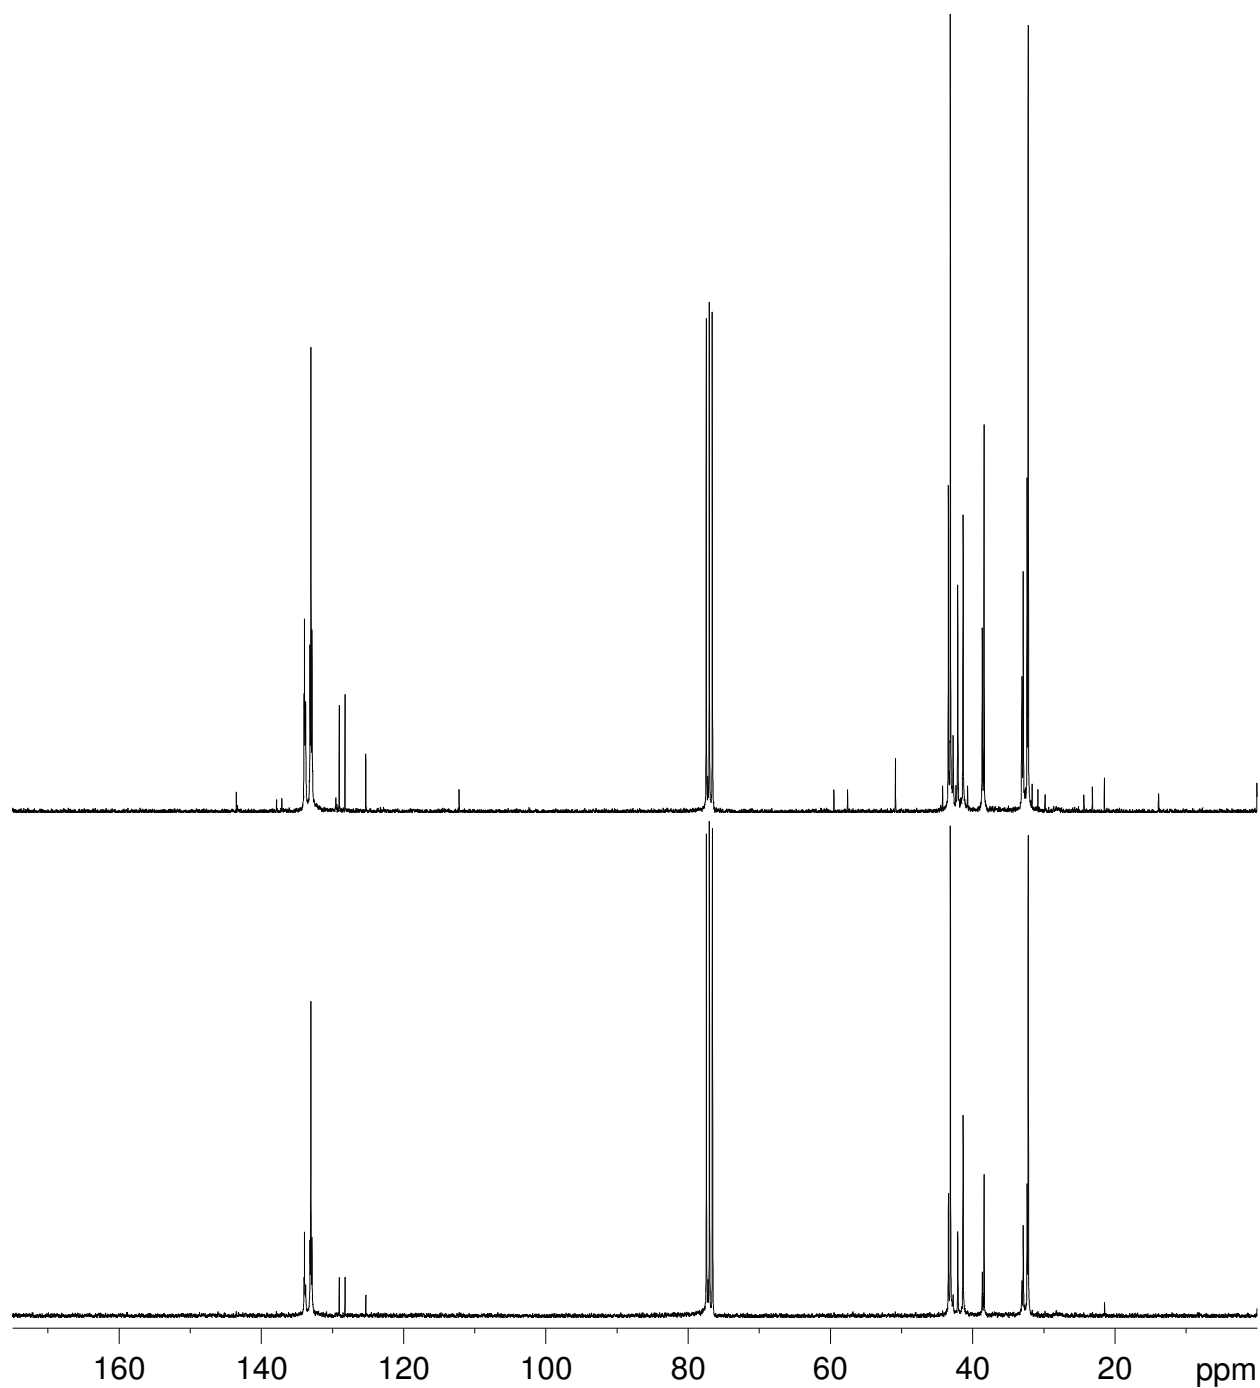

Figure S9.  $^{13}\text{C}$  NMR (75 MHz,  $\text{CDCl}_3$ ) spectra for the polymerization of norbornene at  $50^\circ\text{C}$  for 1 h with a)  $[\text{NB}]/[\text{limonene oxide}] = 3$  ( $M_w = 7800\text{ g/mol}$ ;  $M_w/M_n = 1.3$ ) and b)  $[\text{NB}]/[\text{limonene oxide}] = 40$  ( $M_w = 24300\text{ g/mol}$ ;  $M_w/M_n = 1.3$ ).

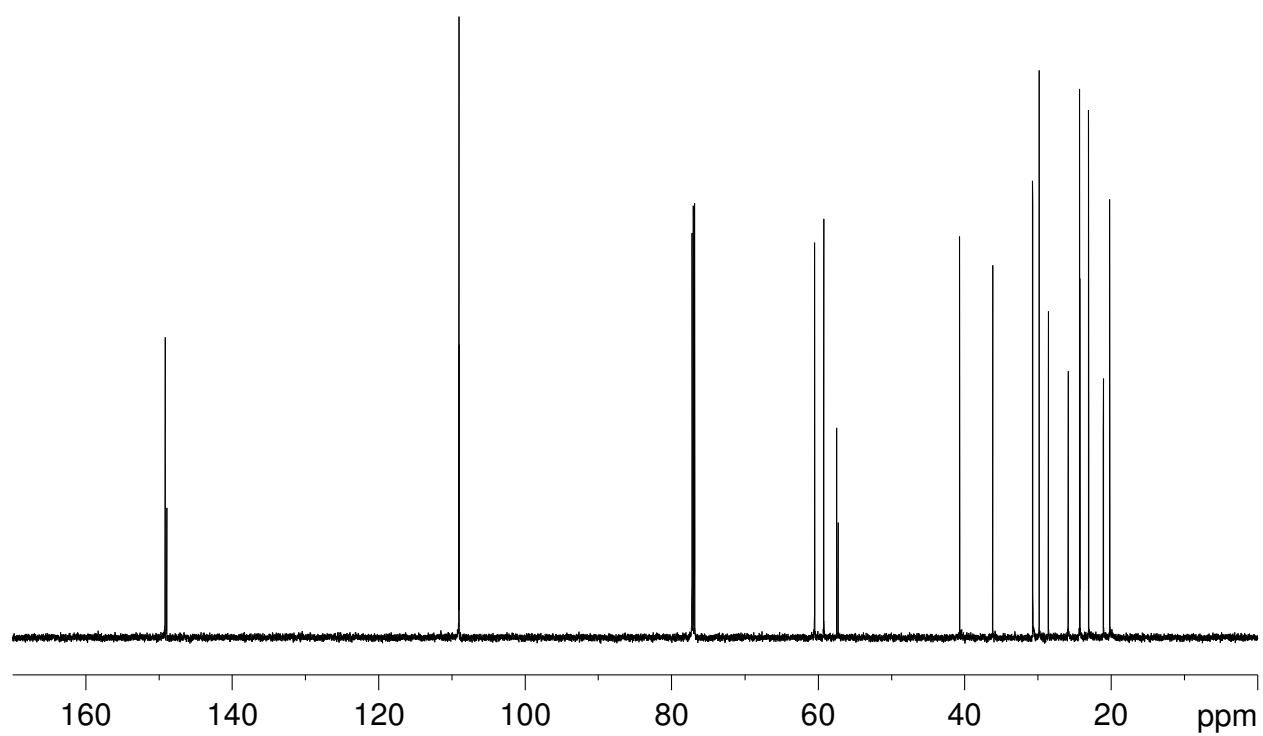

Figure S10.  $^{13}\text{C}$  NMR (176 MHz,  $\text{CDCl}_3$ ) spectrum for limonene oxide.

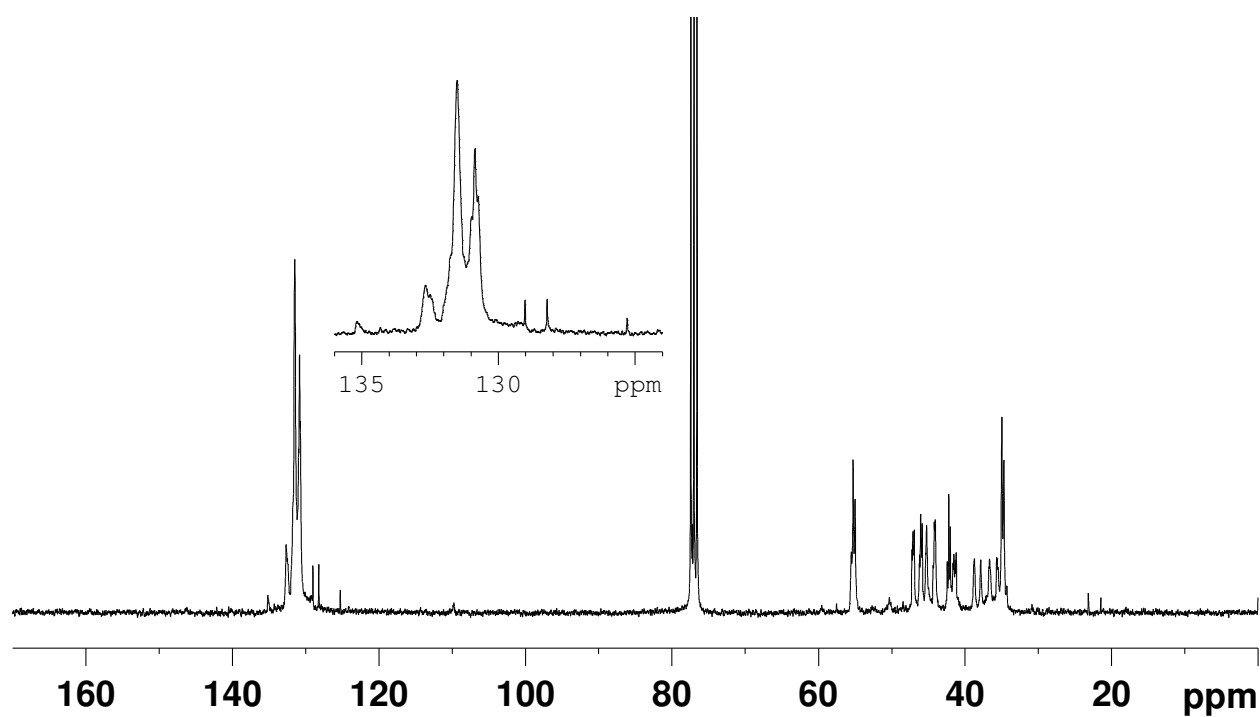

Figure S11.  $^{13}\text{C}$  NMR (75 MHz,  $\text{CDCl}_3$ ) spectrum for the polymerization of dicyclopentadiene (0.3 M) in toluene with limonene oxide ( $[\text{dicyclopentadiene}]/[\text{limonene oxide}] = 5$ ) after 1 h at  $50^\circ\text{C}$  using a second generation ruthenium catalyst ( $[\text{dicyclopentadiene}]/[\text{catalyst}] = 1000$ ).

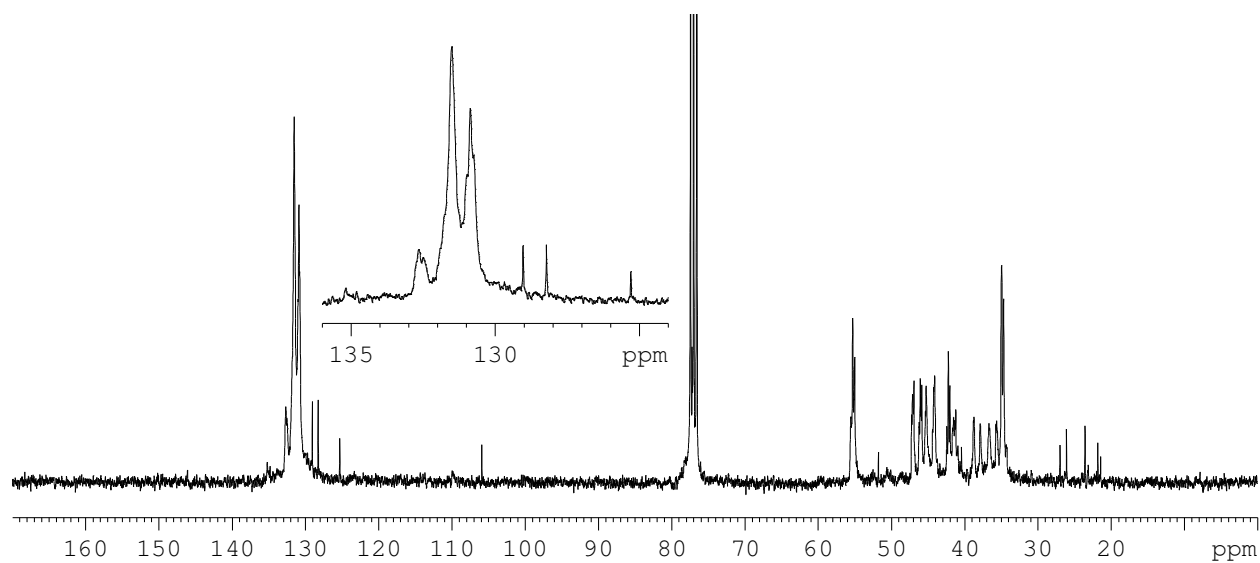

Figure S12.  $^{13}\text{C}$  NMR (75 MHz,  $\text{CDCl}_3$ ) spectrum for the polymerization of dicyclopentadiene (0.3 M) in toluene with  $\beta$ -pinene ( $[\text{dicyclopentadiene}]/[\beta\text{-pinene}] = 5$ ) after 1 h at  $50^\circ\text{C}$  using a second generation ruthenium catalyst ( $[\text{dicyclopentadiene}]/[\text{catalyst}] = 1000$ ).
